# Supplementary material for: A nitrogen doped carbonized metal–organic framework for high stability room temperature sodium–sulfur batteries
Source: Royal Society of Chemistry journal article supplement (doi:10.1039/c6ta04529d), 2016-01-01
Supplement: c6ta04529d1.pdf [file c6ta04529d1.pdf]

## SUPPORTING INFORMATION

### **Nitrogen Doped Carbonized Metal Organic Framework for High Stability Room Temperature Sodium-Sulfur Battery**

Yu-Ming Chen<sup>1</sup>, Wenfeng Liang<sup>1</sup>, Si Li<sup>1</sup>, Feng Zou<sup>1</sup>, Sarang M. Bhaway<sup>2</sup>, Zhe Qiang<sup>2</sup>,  
Min Gao<sup>3</sup>, Bryan D. Vogt<sup>2</sup>, Yu Zhu\*<sup>1</sup>

<sup>1</sup>*Department of Polymer Science, University of Akron, Akron, Ohio 44325 USA*

<sup>2</sup>*Department of Polymer Engineering, University of Akron, Akron, Ohio 44325 USA*

<sup>3</sup>*Liquid Crystal Institute, Kent State University, Kent, Ohio 44242, USA*

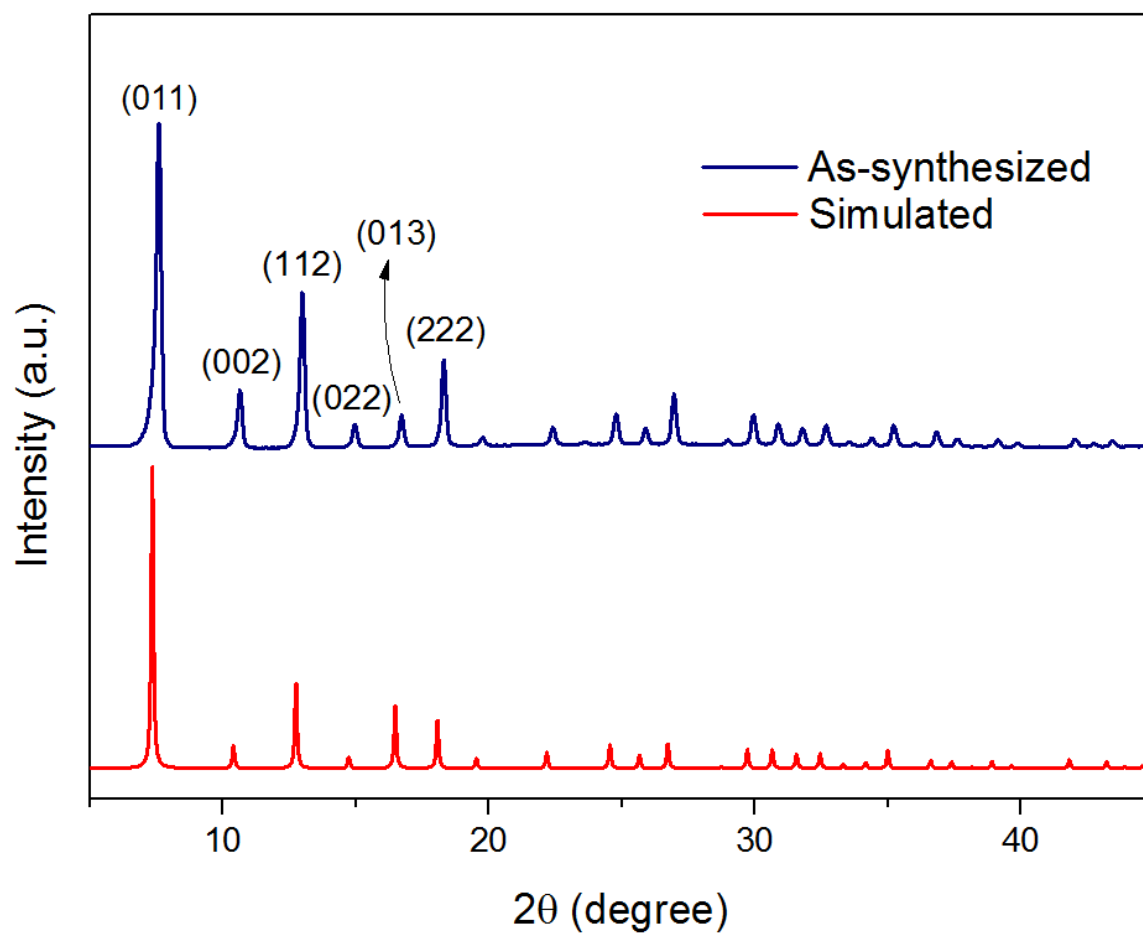

**Fig. S1.** XRD patterns of the simulated ZIF-8 and as synthesized ZIF-8 structures.

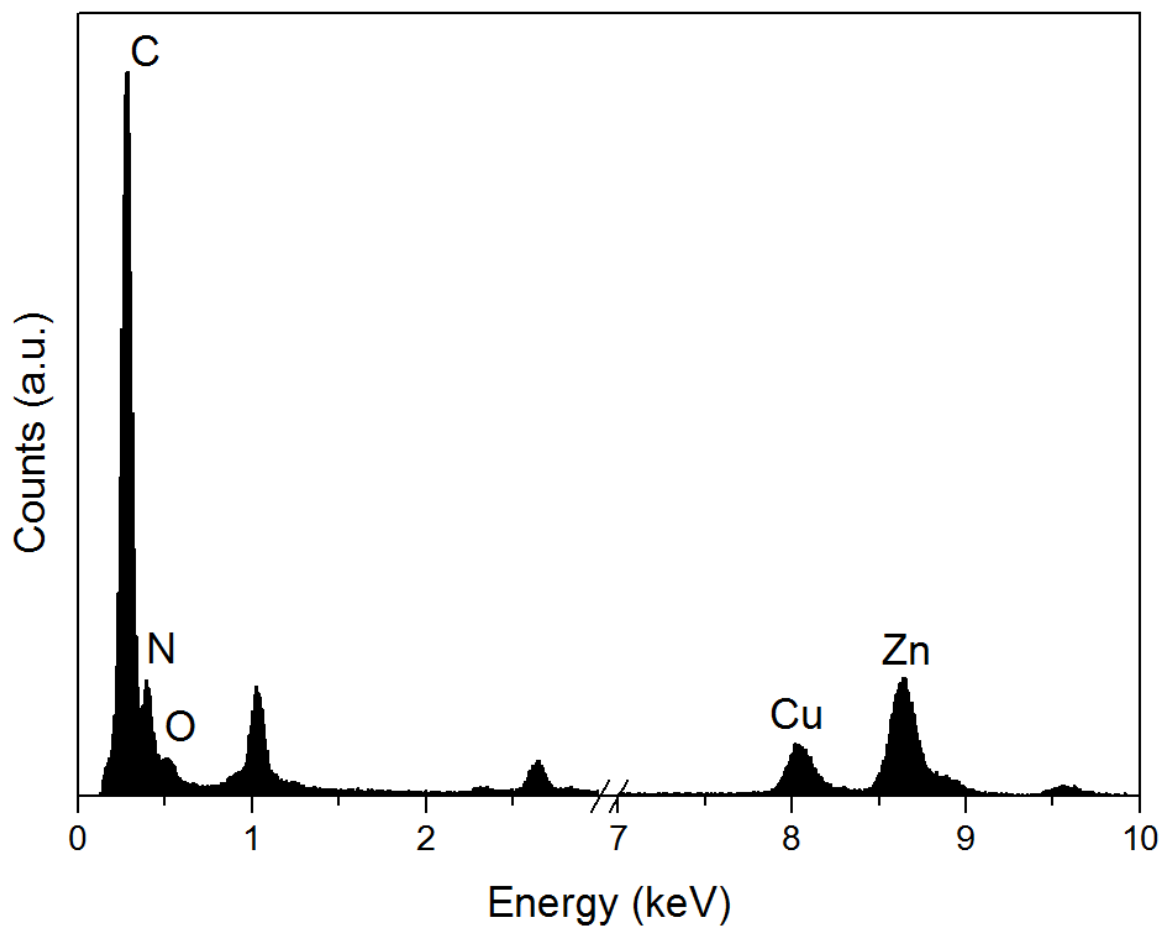

**Fig. S2.** HRTEM-EDS quantification results of existing elements. The weight percentage quantification of important elements are as following: C 68.18%, N 9.23%, O 1.34%.

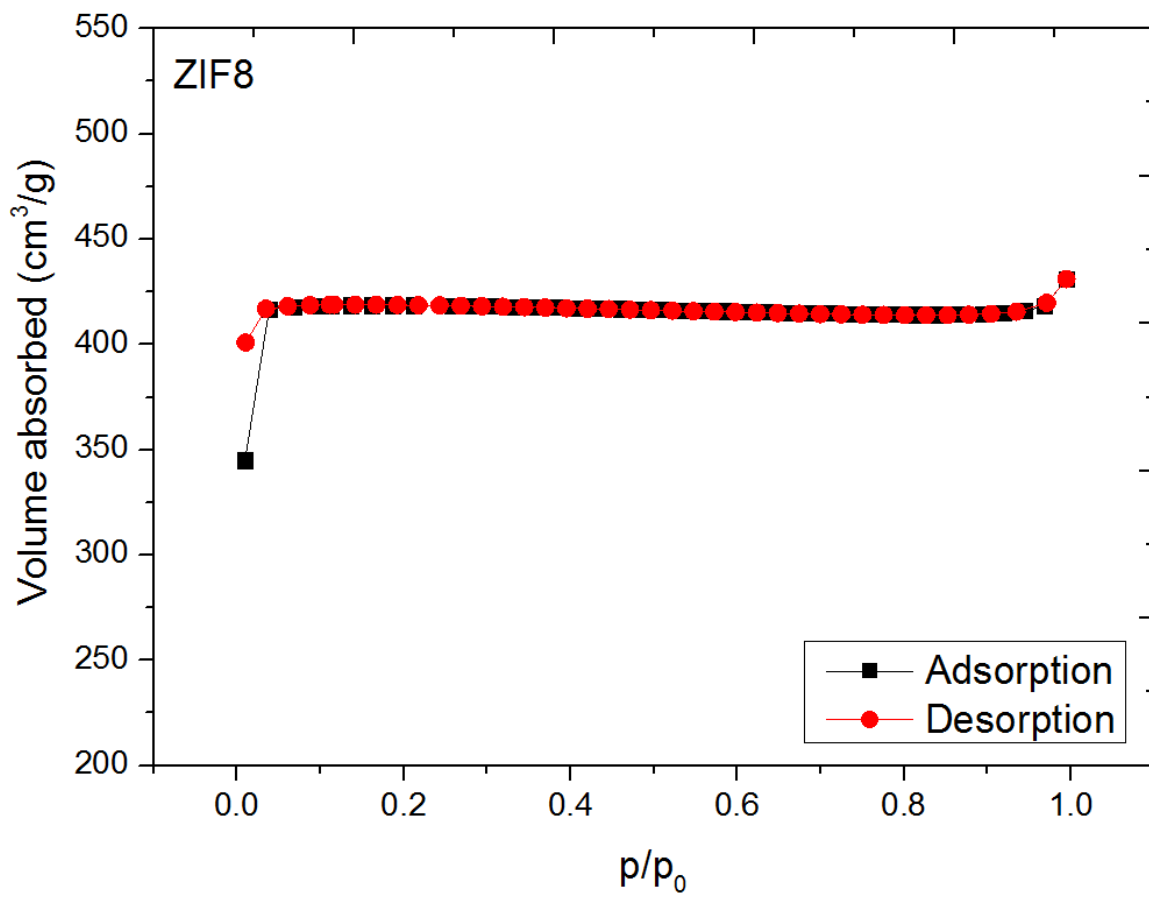

Fig. S3. ZIF-8 BET Data.

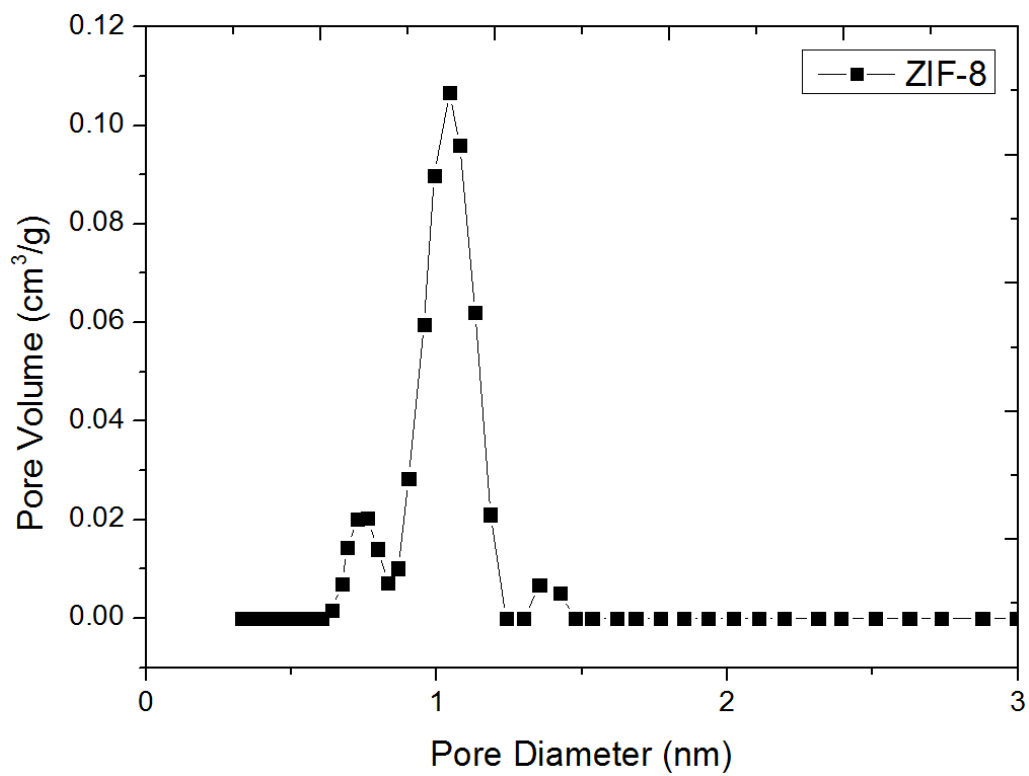

**Fig. S4.** ZIF-8 micropore analysis using CO<sub>2</sub>. Pore size distribution was determined by using NLDFT model.

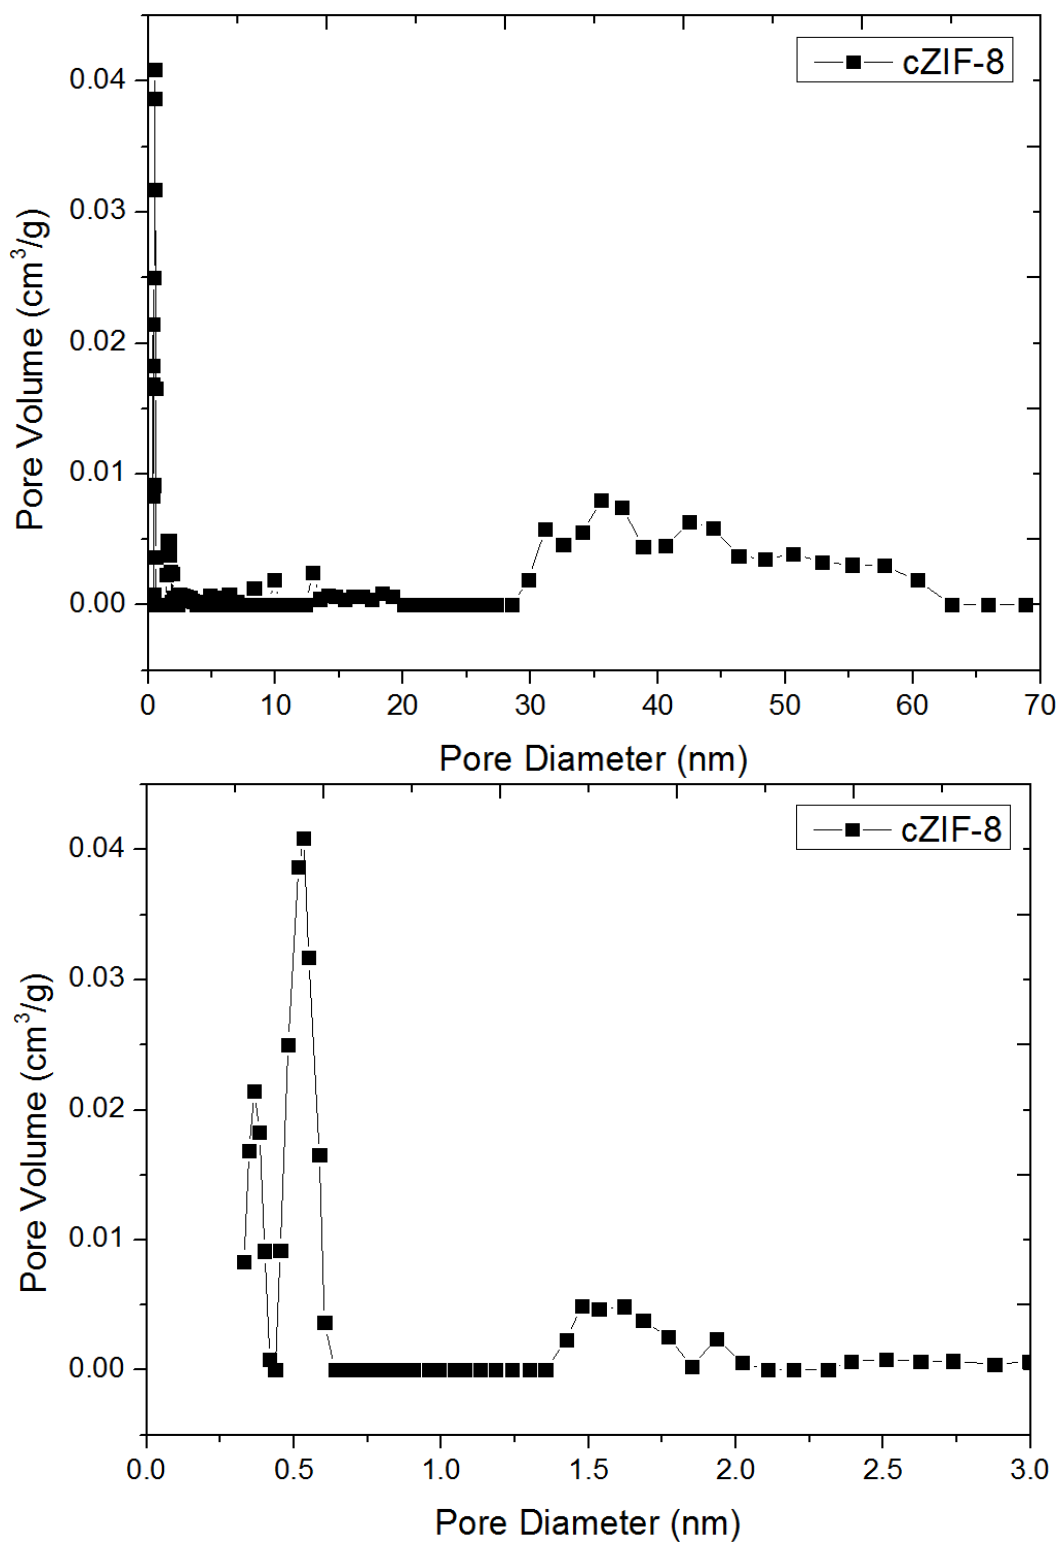

**Fig. S5.** cZIF-8 micropore analysis using CO<sub>2</sub>. Pore size distribution was determined by using NLDFT model. (a) Overview of the pore distribution (b) enlargement from range 0-3nm.

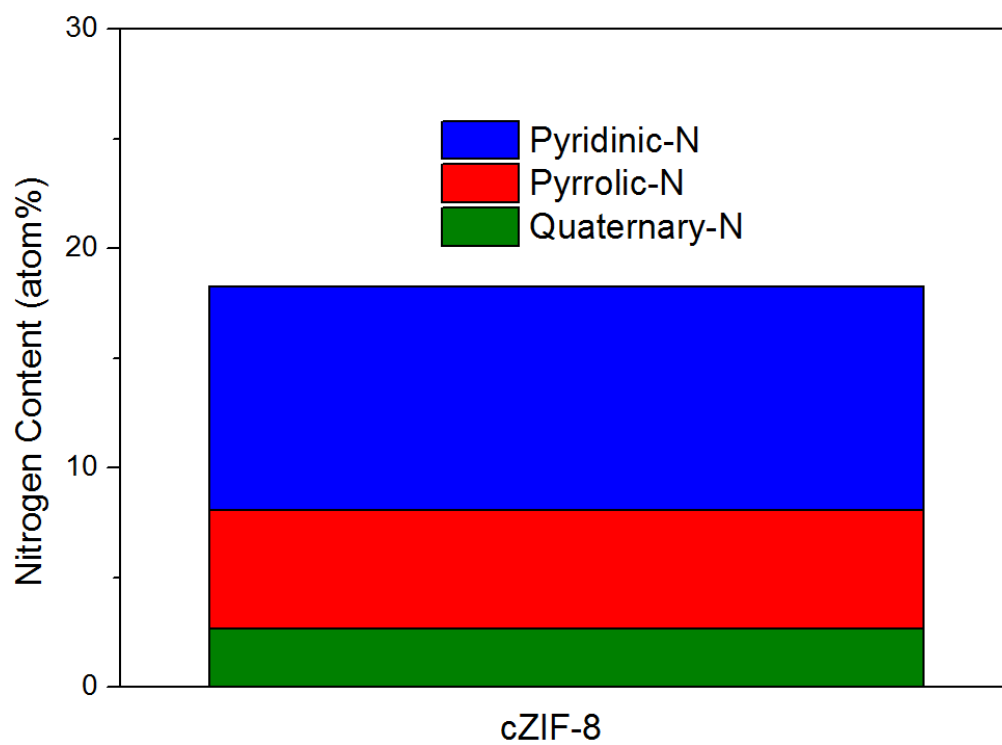

**Fig. S6.** Nitrogen contents were given as stacked columns, where the pyridinic-N, pyrrolic-N and quaternary-N gives a atomic ratio contribution of 10.2%, 5.4%, and 2.7%, respectively to the overall 18.3%.

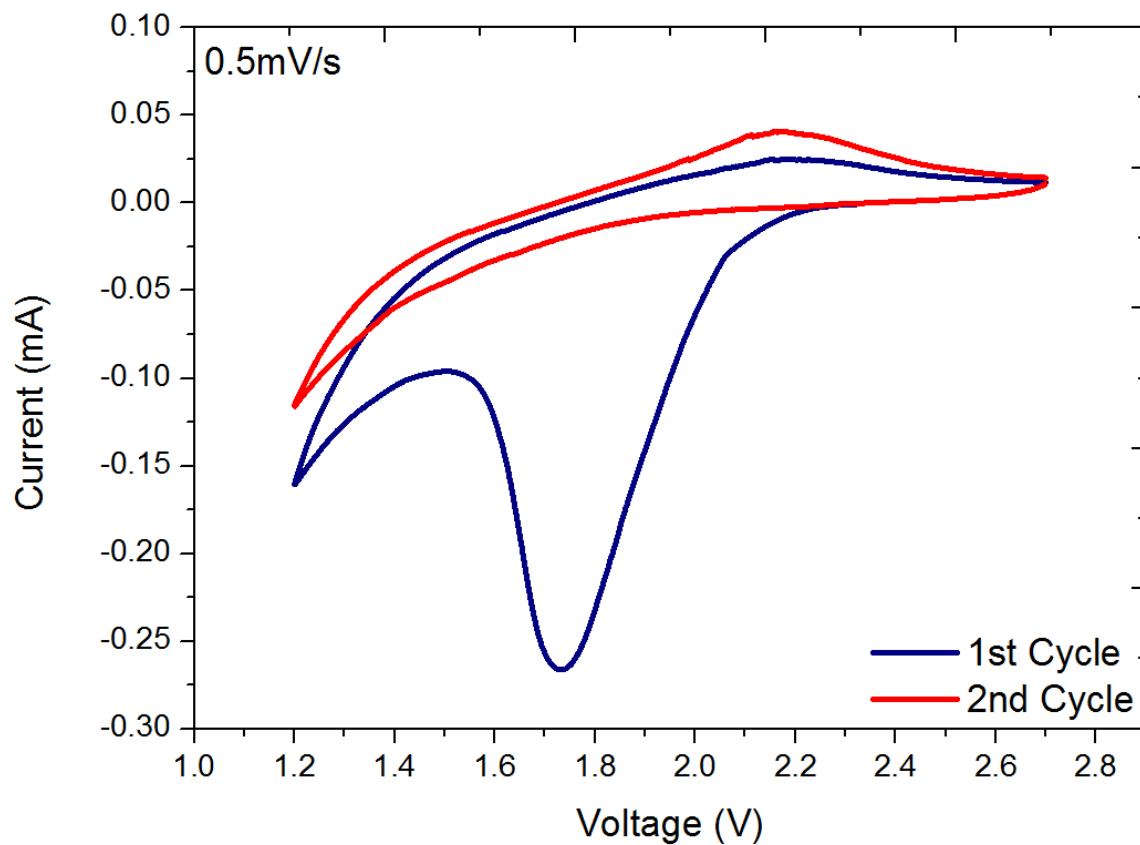

**Fig. S7.** Cyclic voltammetry (CV) for the Na-S battery, the CV was scanned at a rate of 0.5mV/s.



**Table S1.** Comparison of sodium-sulfur cell references and similar lithium-sulfur cell with cathode composition and their electrochemical performances.

| Reference                         | Cathode Composition                                          | Electrolyte                                                  | Rate                             | Capacity (mAh/g)                | Cycles                 |
|-----------------------------------|--------------------------------------------------------------|--------------------------------------------------------------|----------------------------------|---------------------------------|------------------------|
| Ryu et al. <sup>1</sup>           | S:Carbon:PEO (60:20:20)                                      | 1M NaCF <sub>3</sub> SO <sub>3</sub> in TEGDME               | 0.144 mA/cm <sup>2</sup>         | 240                             | 10                     |
| Yu et al. <sup>2</sup>            | MWCNT fabric with Na <sub>2</sub> S <sub>6</sub> catholyte   | 1.5M NaClO <sub>4</sub> and 0.3M NaNO <sub>3</sub> in TEGDME | 0.1 C                            | ~400                            | 30                     |
| Yu et al. <sup>3</sup>            | Na <sub>2</sub> S/MWCNT (8:2)                                | 1.5M NaClO <sub>4</sub> and 0.3M NaNO <sub>3</sub> in TEGDME | C/10<br>C/3                      | 560<br>380                      | 50<br>50               |
| Yu et al. <sup>4</sup>            | CNF/AC Composite/Na <sub>2</sub> S <sub>6</sub>              | 1.5M NaClO <sub>4</sub> and 0.2M NaNO <sub>3</sub> in TEGDME | C/5                              | ~550                            | 100                    |
| Xin et al. <sup>5</sup>           | S/(CNT@MPC):Super P:PVDF (8:1:1)                             | 1M NaClO <sub>4</sub> EC/PC (v:v = 1:1)                      | 0.1 C<br>1 C<br>2 C              | ~1000<br>~600<br>~580           | 20<br>200<br>200       |
| Wang et al. <sup>6</sup>          | (S+carbonized PAN composite):acetylene black:PTFE (70:20:10) | 1M NaClO <sub>4</sub> in EC/DMC (v:v = 2:1)                  | 0.1 mA/cm <sup>2</sup>           | ~500                            | 18                     |
| Kim et al. <sup>7</sup>           | S/C(Activated carbon):Super P:PVDF (6:2:2)                   | 1M NaCF <sub>3</sub> SO <sub>3</sub> in TEGDME               | 1/64 C                           | 521                             | 104                    |
| Kim et al. <sup>8</sup>           | SPAN webs                                                    | 1M NaPF <sub>6</sub> in EC/DEC (v:v = 1:1)                   | 0.1 C                            | 266 (g <sub>electrode</sub> )   | 200                    |
| Hwang et al. <sup>9</sup>         | c-PANS NFs:Super P:PVDF (70:15:15)                           | 0.8M NaClO <sub>4</sub> in EC/DEC (v:v = 1:1)                | 0.22 A/g <sub>total</sub>        | 219 (g <sub>electrode</sub> )   | >500                   |
| Yu et al. <sup>10</sup>           | Na <sub>2</sub> S/AC-CNF                                     | 1.5M NaClO <sub>4</sub> and 0.2M NaNO <sub>3</sub> in TEGDME | C/5                              | ~600                            | 100                    |
| Kim et al. <sup>11</sup>          | S/C(Activated carbon):Super P:PVDF (6:2:2)                   | 1M NaCF <sub>3</sub> SO <sub>3</sub> in TEGDME               | 1/128 C                          | 782                             | 37                     |
| Bauer et al. <sup>12</sup>        | S:Carbon:MWCNT:PTFE (42.5:42.5:12:3)                         | 1M NaClO <sub>4</sub> in TEGDME                              | 0.1 C                            | 350                             | 20                     |
| Zhang et al. <sup>13</sup> (Li-S) | DHCS-S:Super P:PVDF (7:2:1)                                  | 1M LiTFSI in TEGDME                                          | 0.1C                             | 690                             | 100                    |
| Wu et al. <sup>14</sup> (Li-S)    | MPCP-S-I/S:Super P:PVDF (8:1:1)                              | 1M LiPF <sub>6</sub> in EC/DEC                               | 100 mA/g <sub>total</sub>        | 210 (g <sub>electrode</sub> )   | 100                    |
| This Work                         | cZIF-8/S:Super P:PVDF                                        | 1M NaClO <sub>4</sub> in TEGDME                              | 0.1 C<br>0.2 C<br>0.2 C<br>0.2 C | 1000<br>~ 850<br>~ 650<br>~ 500 | 10<br>20<br>100<br>250 |

## References

1. H. Ryu, T. Kim, K. Kim, J.-H. Ahn, T. Nam, G. Wang and H.-J. Ahn, *Journal of Power Sources*, 2011, **196**, 5186-5190
2. X. Yu and A. Manthiram, *The Journal of Physical Chemistry C*, 2014, **118**, 22952-22959
3. X. Yu and A. Manthiram, *Chemistry – A European Journal*, 2015, **21**, 4233-4237.
4. X. Yu and A. Manthiram, *Advanced Energy Materials*, 2015, **5**, 1500350.
5. S. Xin, Y.-X. Yin, Y.-G. Guo and L.-J. Wan, *Advanced Materials*, 2014, **26**, 1261-1265.
6. J. Wang, J. Yang, Y. Nuli and R. Holze, *Electrochemistry Communications*, 2007, **9**, 31-34.
7. I. Kim, J.-Y. Park, C. H. Kim, J.-W. Park, J.-P. Ahn, J.-H. Ahn, K.-W. Kim and H.-J. Ahn, *Journal of Power Sources*, 2016, **301**, 332-337.
8. I. Kim, C. H. Kim, S. h. Choi, J.-P. Ahn, J.-H. Ahn, K.-W. Kim, E. J. Cairns and H.-J. Ahn, *Journal of Power Sources*, 2016, **307**, 31-37.
9. T. H. Hwang, D. S. Jung, J.-S. Kim, B. G. Kim and J. W. Choi, *Nano Letters*, 2013, **13**, 4532-4538.
10. X. Yu and A. Manthiram, *Chemistry of Materials*, 2016, **28**, 896-905.
11. I. Kim, J.Y. Park, C.H. Kim, J.W. Park, J.P. Ahn, J.H. Ahn, K.W. Kim and H.J. Ahn, *Journal of the Electrochemical Society*, 2016, **163**, A611-A616
12. I. Bauer, M. Kohl, H. Althues and S. Kaskel, *Chemical Communications*, 2014, **50**, 3208-3210
13. J. Zhang, H. Hu, Z. Li and X. W. Lou, *Angewandte Chemie International Edition*, 2016, **55**, 3982-3986.
14. H. B. Wu, S. Wei, L. Zhang, R. Xu, H. H. Hng and X. W. Lou, *Chemistry – A European Journal*, 2013, **19**, 10804-10808.
